# Supplementary material for: Identification of Ossnrk1a−1 Regulated Genes Associated with Rice Immunity and Seed Set
Source: MDPI journal article supplement (doi:10.3390/plants13050596), 2024-02-22
Supplement: s1 [file s1]

Supplementary file S1

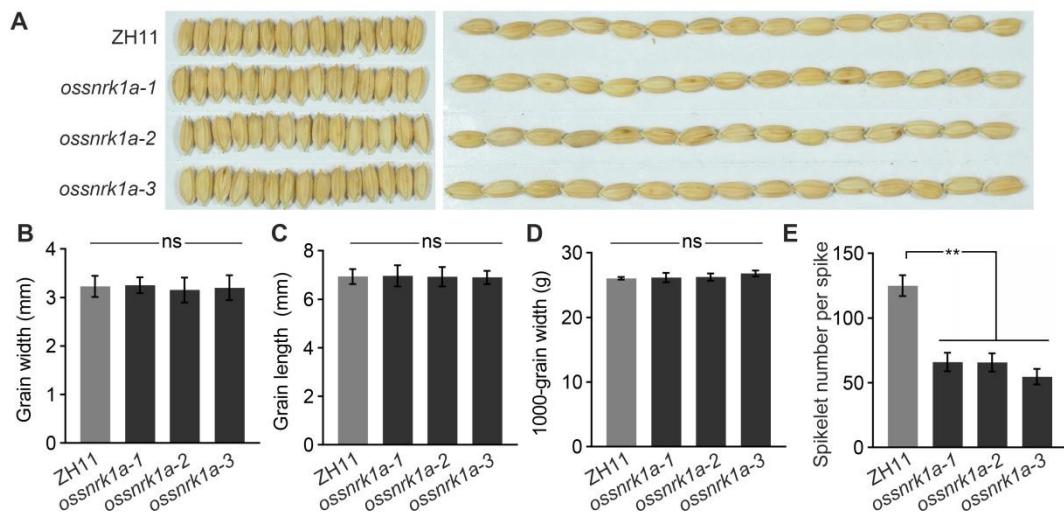

**Figure S1.** The *ossnrk1a* mutants displayed no obvious defects in grain size and weight, compared with the wild type. **(A)** Morphology of mature grains from ZH11 and the *ossnrk1a* mutants. **(B)** and **(C)** Measurement of grain width, and grain length of ZH11 and *ossnrk1a* mutant seeds, respectively. with bars representing mean values  $\pm$  SD ( $n = 15$ ). **(D)** 1000-grain weight of ZH11 and *ossnrk1a* mutants with bars representing means  $\pm$  SD ( $n = 3$ ). **(E)** The spikelet number per spike of ZH11 and *ossnrk1a* mutants with bars representing means  $\pm$  SD. “ns” means no significance by Student’s *t*-test.

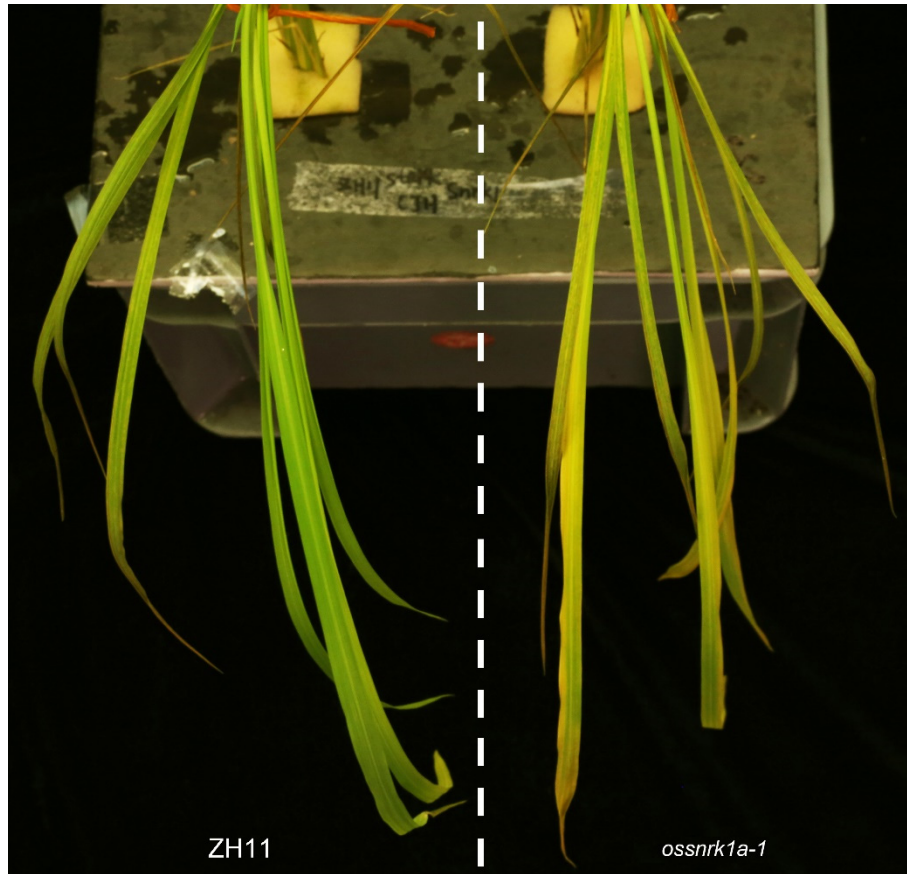

**Figure S2.** Phenotypes of ZH11 and *ossnrk1a-1* under starvation/continuously dark stresses. After 4-day continuously dark treatment, the water-culturing ZH11 (left) and *ossnrka-1* (right) plants were imaged.

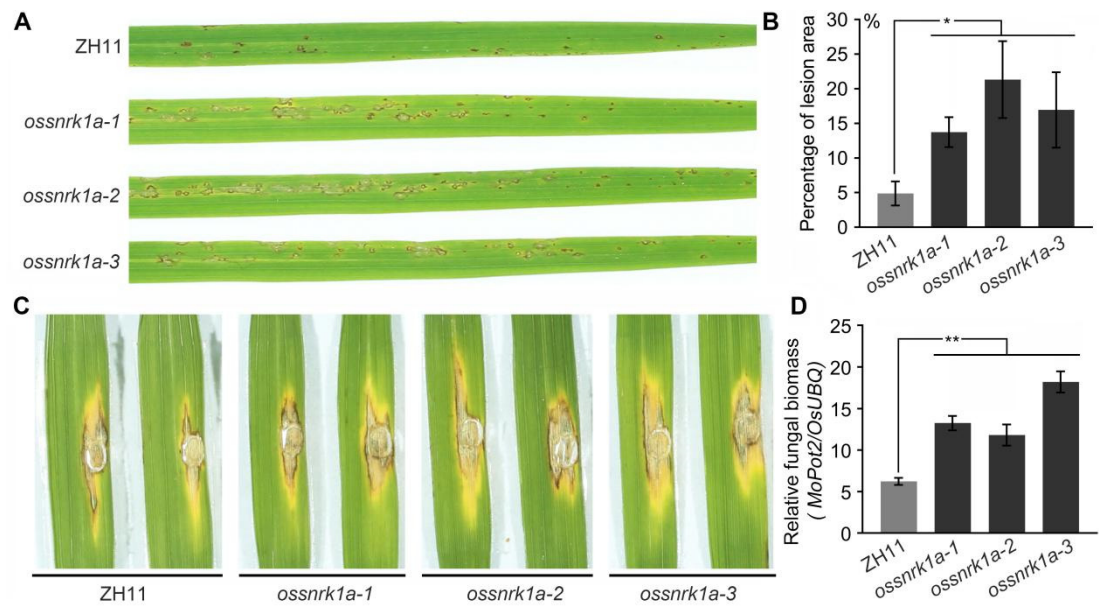

**Figure S3.** The *ossnrk1a* mutants showed more susceptibility to *M. oryzae* infection. **(A)** and **(B)** Spraying inoculation on 3-week-old ZH11 and *ossnrk1a* mutants seedlings with Guy11 conidia. The leaves of *ossnrk1a* mutants at 5 dpi displayed larger diseased lesion area, compared to those of ZH11. **(C)** Five-week-old plants of ZH11 and *ossnrk1a* mutants were subjected to punch inoculation with Guy11 conidia. The diseased leaves were photographed at 9 dpi. **(D)** Fungal biomass of the punch-inoculation leaves was measured by qPCR analysis (*MoPot2/OsUBQ*) with extracted genomic DNA as templates. Bars in **(B)** and **(D)** are means  $\pm$  SD from three biological replicates. Significant differences were determined by Student's *t*-test (\*,  $p < 0.05$  and \*\*,  $p < 0.01$ ).

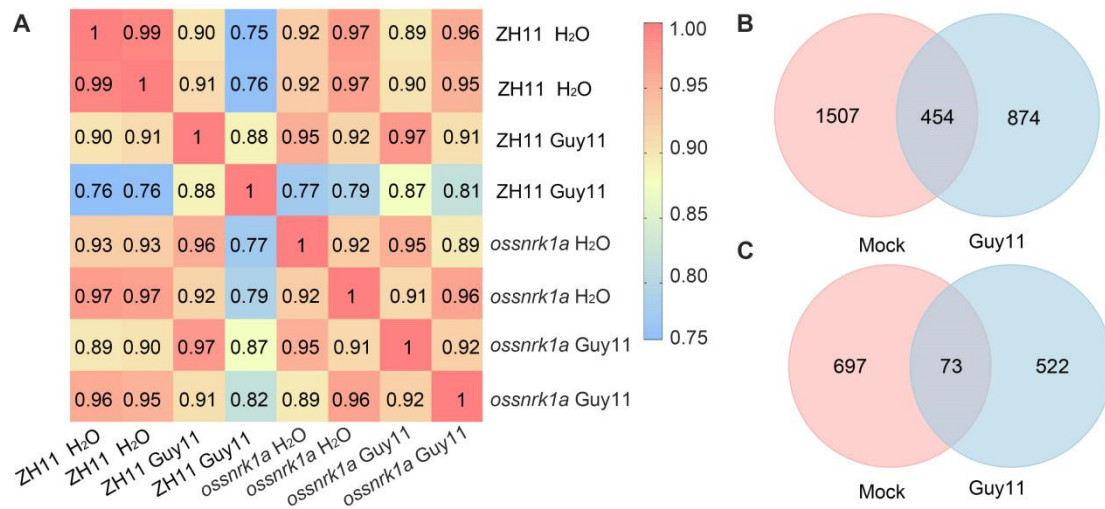

**Figure S4.** Correlation analysis of the transcriptome replicates and venn plots of the DEGs in *ossnrk1a-1* and ZH11. **(A)** Correlation analysis using Pearson correlation coefficient indicating high correlation coefficients of the biological replicates for each sample in RNA-seq. **(B)** and **(C)** are the venn diagrams indicating the upregulated (B) and downregulated (C) DEGs numbers from *ossnrk1a-1* vs. ZH11 with non-pathogen (pink pie) and Guy11 infection treatments (blue pie), respectively.

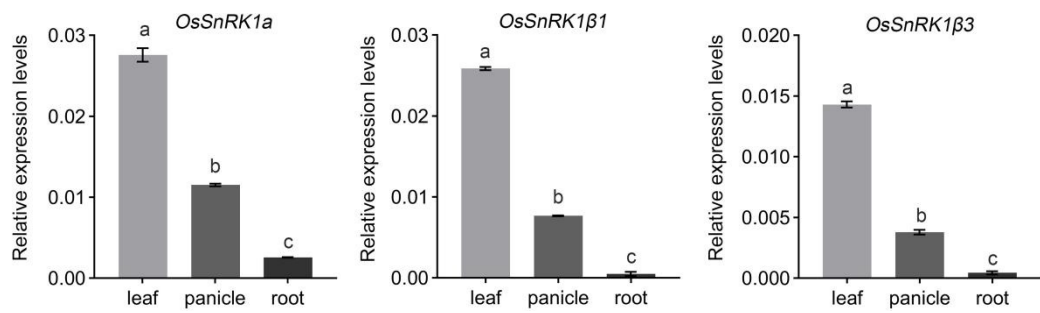

**Figure S5.** Transcript levels of *OsSnRK1a*, *OsSnRK1β1* and *OsSnRK1β3* in leaf, young panicle and root tissues of ZH11 at heading stage. Data are means  $\pm$  SD ( $n = 3$ ). Statistically significant differences were indicated by Mann-Whitney test (Different letters mean significant difference among treatments ( $p < 0.05$ )).

**Table S1.** List of primer pairs used in this study.

| Plasmid construction     |                                                            |                                                              |
|--------------------------|------------------------------------------------------------|--------------------------------------------------------------|
| Gene                     | Forward Sequence (5'-3')                                   | Reverse sequence (5'-3')                                     |
| OsSnRK1a-GFP             | ACTGGGATCCATGGAGGGAGCT<br>GGCAGAGA                         | ACTGGAATTCAAGGACTCTC<br>AGCTGAGTTA                           |
| OsSnRK1 $\beta$ 1-GFP    | CGCTCTAGAACTAGTGGATCCAT<br>GGGGAACGCGAGCGGGC               | GATAAGCTTGATATCGAATTC<br>TCGTTCAATGGGCTTATACAG               |
| OsSnRK1 $\beta$ 3-GFP    | ACTGGGATCCATGGGGAACGCG<br>AGCGGCAA                         | ACTGGTCGACACCACCATTCT<br>TTGTTGCTTC                          |
| OsSnRK1a-HA              | ACTGGGATCCATGGAGGGAGCT<br>GGCAGAGA                         | ACTGGAATTCAAGGACTCTC<br>AGCTGAGTTA                           |
| OsSnRK1a-nLUC            | GGGGACAAGTTTGTACAAAAA<br>GCAGGCTTCATGGAGGGAGCTG<br>GCAGAGA | GGGGACCACTTTGTACAAGA<br>AAGCTGGGTCAAGGACTCTC<br>AGCTGAGTTA   |
| OsSnRK1 $\beta$ 1-cLUC   | GGCGGTACCCGGGATCCAATGG<br>GGAACGCGAGCGGGC                  | GAAAGCTCTGCAGGTCGACC<br>TAtCGTTCAATGGGCTTATACA<br>G          |
| OsSnRK1 $\beta$ 3-cLUC   | GGGGACAAGTTTGTACAAAAA<br>GCAGGCTTCATGGGGAACGCGA<br>GCGGCAA | GGGGACCACTTTGTACAAGA<br>AAGCTGGGTCAACCACCATTCT<br>TTGTTGCTTC |
| pGADT7-OsSnRK1 $\beta$ 1 | GTACCAGATTACGCTCATATGAT<br>GGGGAACGCGAGCGGGC               | ATGCCCACCCGGGTGGAATTC<br>CTACTATCGTTCAATGGGCTT               |

|                              |                                    |                                    |
|------------------------------|------------------------------------|------------------------------------|
|                              |                                    | ATACAG                             |
| pGADT7-<br>OsSnRK1 $\beta$ 3 | ACTGCATATGATGGGGAACGCG<br>AGCGGCAA | ACTGGGATCCTTAACCACCAT<br>TCTTTGTTC |
| qRT-PCR                      |                                    |                                    |
| Gene                         | Forward Sequence (5'-3')           | Reverse sequence (5'-3')           |
| OsAOS2                       | CGTCCAAAGTTTCGGGAGTT               | CTCCATGGCGCCTAGCTAA                |
| OsJAMyb                      | GAGGACCAGAGTGCAAAAGC               | CATGGCATCCTTGAACCTCT               |
| osWRKY45                     | GGACGCAGCAATCGTCCGGG               | CGGAAGTAGGCCTTTGGGT                |
| OsNADHG<br>OGAT2             | CCTGTCTGAAGGATGATGAAGGT<br>GAAACC  | TGCATGGCCCTACTATCTTCG<br>CATCA     |
| OsPR1b                       | ACGGGCGTACGTACTGGCTA               | CTCGGTATGGACCGTGAAG                |
| OsSnRK1 $\beta$ 1            | TGTGGACGCTTGGAGGAAA                | CCGATGGAAGTATCAACAGG<br>AG         |
| OsSnRK1 $\beta$ 3            | GGACATCAAGGAGGGTGTTAGA             | CATCAGCCACATGAGGTAGTT<br>C         |
| OsSnRK1a                     | CGAATCACTTCACAAGAGACTG             | CTGGAGTTACTTGAGCGAGA<br>G          |
| OsUBQ                        | TTCTGGTCCTTCCACTTTCAG              | ACGATTGATTTAACCAGTCCA<br>TGA       |
| MoPot2                       | ACGACCCGTCTTTACTTATTTGG            | AAGTAGCGTTGGTTTTGTTGG<br>AT        |

**Table S2.** Gene ID, FPKM, and functions of DEGs in Fig 3 and Fig 4.

| GO name                           | Gene ID        | FPKM                            |       |                            |       |                                           |      |                                  |       | Functions                                                             |
|-----------------------------------|----------------|---------------------------------|-------|----------------------------|-------|-------------------------------------------|------|----------------------------------|-------|-----------------------------------------------------------------------|
|                                   |                | ZH11_H <sub>2</sub> O<br>(Mock) |       | ZH11_Guy1<br>1<br>(48 hpi) |       | ossnrk1a-<br>1_H <sub>2</sub> O<br>(Mock) |      | ossnrk1a-<br>1_Guy11<br>(48 hpi) |       |                                                                       |
| response to<br>biotic<br>stimulus | LOC_Os06g34400 | 7.97                            | 7.38  | 23.86                      | 14.45 | 8.59                                      | 5.75 | 6.57                             | 6.95  | zinc finger, C3HC4 type domain containing protein                     |
|                                   | LOC_Os07g08300 | 16.81                           | 13.14 | 29.94                      | 15.46 | 14.25                                     | 9.91 | 15.58                            | 12.47 | major facilitator superfamily antiporter, putative, expressed         |
|                                   | LOC_Os01g41750 | 0.88                            | 0.79  | 2.50                       | 2.84  | 1.31                                      | 0.94 | 1.42                             | 0.97  | expressed protein                                                     |
|                                   | LOC_Os05g29710 | 0.66                            | 1.11  | 11.15                      | 1.87  | 0.66                                      | 0.62 | 0.97                             | 0.77  | RING-H2 finger protein, putative, expressed                           |
|                                   | LOC_Os03g03700 | 0.56                            | 0.21  | 4.12                       | 0.14  | 0.55                                      | 2.82 | 2.15                             | 1.61  | MLO domain containing protein, putative, expressed                    |
|                                   | LOC_Os05g28770 | 0.49                            | 0.57  | 2.28                       | 1.64  | 0.60                                      | 0.36 | 0.57                             | 0.64  | GCRP9 - Glycine and cysteine rich family protein precursor, expressed |
|                                   | LOC_Os01g713   | 2.64                            | 7.92  | 39.98                      | 27.70 | 25.39                                     | 5.29 | 20.13                            | 13.54 | glycosyl hydrolases family 17, putative,                              |

|  |                |       |       |        |        |       |       |       |       |                                                                  |
|--|----------------|-------|-------|--------|--------|-------|-------|-------|-------|------------------------------------------------------------------|
|  | 50             |       |       |        |        |       |       |       |       | expressed                                                        |
|  | LOC_Os10g39700 | 0.65  | 1.39  | 1.72   | 3.28   | 2.57  | 0.91  | 1.26  | 0.84  | CHIT15 - Chitinase family protein precursor, putative, expressed |
|  | LOC_Os05g51610 | 3.49  | 3.68  | 24.34  | 8.59   | 3.16  | 2.10  | 5.56  | 5.64  | sodium/calcium exchanger protein, putative, expressed            |
|  | LOC_Os10g13700 | 1.53  | 1.13  | 3.84   | 2.45   | 1.09  | 1.04  | 1.50  | 1.08  | phosphoenolpyruvate carboxykinase, putative, expressed           |
|  | LOC_Os03g55670 | 53.14 | 81.03 | 358.81 | 112.07 | 70.03 | 67.68 | 96.48 | 60.93 | expressed protein                                                |
|  | LOC_Os07g13100 | 1.41  | 2.73  | 9.18   | 2.37   | 1.72  | 1.47  | 1.19  | 1.48  | DNA binding protein, putative, expressed                         |
|  | LOC_Os12g44070 | 0.04  | 0.00  | 2.35   | 1.15   | 0.38  | 0.32  | 0.43  | 0.19  | nodulin, putative, expressed                                     |
|  | LOC_Os05g45980 | 0.83  | 0.67  | 2.07   | 1.08   | 0.56  | 0.37  | 0.64  | 0.61  | expressed protein                                                |
|  | LOC_Os02g10120 | 7.09  | 7.68  | 4.98   | 5.20   | 3.69  | 5.64  | 1.19  | 0.96  | lipoxygenase gene                                                |
|  | LOC_Os03g23050 | 0.17  | 0.00  | 0.29   | 0.20   | 0.05  | 0.07  | 0.16  | 0.04  | expressed protein                                                |
|  | LOC_Os01g713   | 4.27  | 20.65 | 96.84  | 161.8  | 50.50 | 22.74 | 56.68 | 22.38 | glycosyl hydrolases family 17, putative,                         |

|                   |                |       |       |        |        |       |       |       |       |                                                                    |
|-------------------|----------------|-------|-------|--------|--------|-------|-------|-------|-------|--------------------------------------------------------------------|
|                   | 40             |       |       |        | 9      |       |       |       |       | expressed                                                          |
|                   | LOC_Os01g28450 | 0.11  | 0.43  | 2.25   | 2.01   | 0.92  | 0.00  | 1.10  | 1.01  | pathogenesis-related protein 1b, OsPR1b                            |
| Energy metabolism | LOC_Os10g21212 | 0.88  | 1.03  | 1.09   | 0.68   | 0.81  | 0.36  | 0.93  | 0.79  | photosystem II 44 kDa reaction center protein, putative, expressed |
|                   | LOC_Os10g21310 | 2.65  | 1.53  | 2.44   | 2.29   | 2.31  | 1.06  | 1.14  | 1.78  | photosystem II P680 chlorophyll A apoprotein, putative, expressed  |
|                   | LOC_Os04g16770 | 16.13 | 11.80 | 17.93  | 10.96  | 12.90 | 4.17  | 8.10  | 10.86 | photosynthetic reaction center protein, putative, expressed        |
|                   | LOC_Os01g64120 | 49.73 | 35.61 | 354.79 | 124.09 | 29.86 | 10.69 | 30.21 | 38.88 | Ferredoxin, OsFd5                                                  |
|                   | LOC_Os08g15322 | 0.72  | 0.38  | 0.73   | 0.64   | 0.79  | 0.32  | 0.15  | 0.34  | cytochrome b559 subunit alpha, putative, expressed                 |
|                   | LOC_Os10g13700 | 1.53  | 1.13  | 3.84   | 2.45   | 1.09  | 1.04  | 1.50  | 1.08  | phosphoenolpyruvate carboxykinase, putative, expressed             |
|                   | LOC_Os08g10020 | 67.21 | 25.69 | 46.05  | 84.54  | 61.70 | 95.72 | 67.62 | 27.98 | photosystem II 10 kDa polypeptide, chloroplast precursor,          |
|                   | LOC_Os05g48200 | 31.19 | 37.52 | 103.53 | 42.72  | 16.17 | 7.87  | 21.02 | 13.19 | NADH-glutamate synthase 2 gene, OsNADH-GOGAT2                      |
|                   | LOC_Os01g580   | 13.55 | 24.04 | 25.47  | 8.76   | 8.06  | 4.50  | 22.04 | 9.12  | NADPH-dependent oxidoreductase, putative,                          |

|                   |                |        |        |        |        |        |        |        |        |                                                                 |
|-------------------|----------------|--------|--------|--------|--------|--------|--------|--------|--------|-----------------------------------------------------------------|
| Energy metabolism | 22             |        |        |        |        |        |        |        |        | expressed                                                       |
|                   | LOC_Os10g21324 | 2.06   | 1.47   | 2.35   | 1.63   | 0.70   | 1.26   | 1.61   | 0.91   | cytochrome b6, putative, expressed                              |
|                   | LOC_Os05g48200 | 31.19  | 37.52  | 103.53 | 42.72  | 16.17  | 7.87   | 21.02  | 13.19  | NADH-glutamate synthase 2 gene, <i>OsNADH-GOGAT2</i>            |
|                   | LOC_Os02g53130 | 23.05  | 2.88   | 6.07   | 9.26   | 2.08   | 1.52   | 2.35   | 4.44   | nitrate reductase gene                                          |
|                   | LOC_Os08g14860 | 6.32   | 7.19   | 22.08  | 8.03   | 5.39   | 7.55   | 13.59  | 4.611  | Hydroxyacid oxidase 1                                           |
|                   | LOC_Os11g13890 | 513.37 | 318.09 | 49.27  | 387.65 | 306.84 | 330.30 | 215.02 | 155.31 | light-harvesting complex II protein                             |
|                   | LOC_Os10g38276 | 2.50   | 2.19   | 0.97   | 0.42   | 1.09   | 0.47   | 1.10   | 0.60   | chloroplast ATP synthase a chain precursor, putative, expressed |
|                   | LOC_Os01g57945 | 8.00   | 5.35   | 6.70   | 4.14   | 2.40   | 2.41   | 4.57   | 2.93   | cytochrome b6-f complex subunit 4, putative, expressed          |
|                   | LOC_Os01g59920 | 15.49  | 10.64  | 4.17   | 8.25   | 6.18   | 2.91   | 2.06   | 3.85   | cysteine synthase, chloroplast precursor, putative, expressed   |
|                   | LOC_Os01g11054 | 12.20  | 7.67   | 13.90  | 12.02  | 8.98   | 4.31   | 11.10  | 11.15  | phosphoenolpyruvate carboxylase                                 |
|                   | LOC_Os10g212   | 2.97   | 1.52   | 1.55   | 1.61   | 1.13   | 0.44   | 1.17   | 1.57   | ATP synthase subunit beta, putative, expressed                  |

---

|  |                |        |        |        |        |       |       |       |       |                                                                                    |
|--|----------------|--------|--------|--------|--------|-------|-------|-------|-------|------------------------------------------------------------------------------------|
|  | 66             |        |        |        |        |       |       |       |       |                                                                                    |
|  | LOC_Os04g16848 | 4.53   | 3.71   | 4.16   | 3.48   | 3.80  | 1.70  | 2.26  | 3.12  | photosystem II reaction center protein H, putative                                 |
|  | LOC_Os08g36480 | 215.28 | 122.94 | 212.15 | 134.45 | 75.89 | 75.76 | 94.87 | 83.29 | nitrate reductase                                                                  |
|  | LOC_Os12g44150 | 64.37  | 53.00  | 28.16  | 37.89  | 28.16 | 37.89 | 36.22 | 31.68 | plasma membrane H <sup>+</sup> -ATPase, <i>OsA3</i>                                |
|  | LOC_Os01g25484 | 6.45   | 4.09   | 13.55  | 6.03   | 4.50  | 0.66  | 1.72  | 2.31  | leaf ferredoxin-nitrite reductase; promoter of shoot regeneration 1, <i>OsNiR1</i> |
